# Supplementary material for: Computational medicinal chemistry applications to target Asian-prevalent strain of hepatitis C virus
Source: Royal Society of Chemistry journal article supplement (doi:10.1039/d3ra04622b), 2023-01-01
Supplement: d3ra04622b1.pdf [file d3ra04622b1.pdf]

## Appendix A – Hardware and Software

**Table S1:** Software used in the study

| S.No. | Software                                                                                   | Study/Method                                 |
|-------|--------------------------------------------------------------------------------------------|----------------------------------------------|
| 1     | SWISS-MODEL [1]                                                                            | Homology Modelling                           |
| 4     | UCSF DOCK6 [2]                                                                             | Virtual Screening                            |
| 5     | UCSF Chimera [3], PyMOL [4], VMD [5],                                                      | Molecular Visualisation                      |
| 6     | BIOVIA Discovery Studio [6], LigPlot [7],<br>PLIP: Protein-Ligand Interaction Profiler [8] | Receptor-ligand interactions                 |
| 7     | Raccoon [9]                                                                                | Splitting batch file of compounds<br>library |
| 8     | OpenBabel [10]                                                                             | Molecular file format conversion             |
| 9     | Avogadro [11], HyperChem [12], ArgusLab<br>[13], ChemDraw [14]                             | Molecular drawing and optimization           |
| 10    | GROMACS 5.1.1 [15]                                                                         | MD Simulations                               |
| 11    | MS Office 365, MS OneNote, Joplin                                                          | Drafting research                            |

**Table S2:** Hardware specifications used in the study

| S. No. | Virtual Machines | Processing | RAM   | Hard Disk |
|--------|------------------|------------|-------|-----------|
| 1      | VM-1             | 40 CPUs    | 64 GB | 2.2 TB    |
| 2      | VM-2             | 20 CPUs    | 32 GB | 1.1 TB    |
| 3      | VM-3             | 40 CPUs    | 64 GB | 1.1 TB    |
| 4      | VM-4             | 20 CPUs    | 64 GB | 1.1 TB    |

## **Appendix B – Synthesis of Fragments of the Hit Compounds**

### **Synthesis of N-(2,4,5-trichlorophenyl)methanesulfonamide (24MSC)**

2,4,5-Trichloroaniline (2 g) was taken in a round-bottomed flask (100 mL) and dissolved into 5% Sodium Carbonate (18 mL). The pH of the reaction mixture was maintained at 8-10. The residue was dissolved in 5% Sodium Carbonate, and methane sulfonyl chloride (0.82 cm<sup>3</sup>) was added and stirred at room temperature for 6 hours and 30 minutes. TLC (hexanes, acetate; 80:20) showed a single spot. The precipitates of products were filtered and dried.

### **Synthesis of N-(2-aminoethyl)-N-(2,4,5-trichlorophenyl)methanesulfonamide (M24D)**

Bromoethylamine (0.18 g) was taken in a round-bottomed flask (150 mL) and dissolved into 5% DMF (15 mL). The residue was dissolved in DMF, and N-(2,4,5-trichlorophenyl)methanesulfonamide (0.4 g) was added and stirred at room temperature for 5 hours and 15 minutes. Lithium hydride (0.002 g) was also added as a catalyst. TLC (hexanes, acetate; 80:20) showed a single spot. The reaction mixture was quenched with the chilled water, the product got precipitated, filtered, and dried.

### **Synthesis of 1-(4-(bromomethyl)phenylsulfonyl)piperidine (BSPP)**

Piperidine (0.37 cm<sup>3</sup>) was taken in a round-bottomed flask (100 mL) and dissolved into 5% Sodium Carbonate (18 mL). The pH of the reaction mixture was maintained at 8-10. Piperidine was dissolved in 5% Sodium Carbonate, and 4-(bromoethyl)benzene-1-sulfonyl chloride (1 g) was added and stirred at room temperature for 7 hours 50 minutes. TLC (hexanes, acetate; 80:20) showed a single spot. The precipitates of products were filtered and dried.

### **Synthesis of N-(2,4-dichlorophenyl)methanesulfonamide (ABR1)**

2,4-dichloroaniline (2 g) was taken in a round-bottomed flask (100 mL) and dissolved into 5% Sodium Carbonate (18 mL). The pH of the reaction mixture was maintained at 8-10. Next, 2,4-dichloroaniline was dissolved in 5% Sodium Carbonate methane sulfonyl chloride (1.4136 g) was added into it and stirred at room temperature for 5 hours and 30 minutes. TLC (hexanes, acetate; 80:20) showed a single spot. Finally, the precipitates of products were filtered and dried.

### **Synthesis of N-(2-aminoethyl)-N-(2,4-dichlorophenyl)methanesulfonamide (ABR2)**

N-(2,4-dichlorophenyl)methanesulfonamide (1 g) was taken in a round-bottomed flask (150 mL) and dissolved into 5% DMF (15 mL). The residue was dissolved in DMF, and Bromoethylamine (0.51 g) was added and stirred at room temperature for 5 hours. Lithium hydride (0.002 g) was also added as a catalyst. TLC (hexanes, acetate; 80:20) showed a single spot. The reaction mixture was quenched with chilled water, and the product precipitated, filtered, and dried.

### **Synthesis of 4-(4-(bromomethyl)phenylsulfonyl)morpholine (BBMP)**

Morpholine (0.32 cm<sup>3</sup>) was taken in the round-bottomed flask (100 mL) and dissolved into 5% Sodium Carbonate (18 mL). The pH of the reaction mixture was maintained at 8-10. Morpholine was dissolved in 5% Sodium Carbonate, and 4-(bromomethyl) benzene-1-sulfonyl chloride (1 g) was added to it and stirred at room temperature for 6 hours and 30 minutes. TLC (hexanes, acetate; 80:20) showed a single spot. The precipitates of products were filtered and dried.

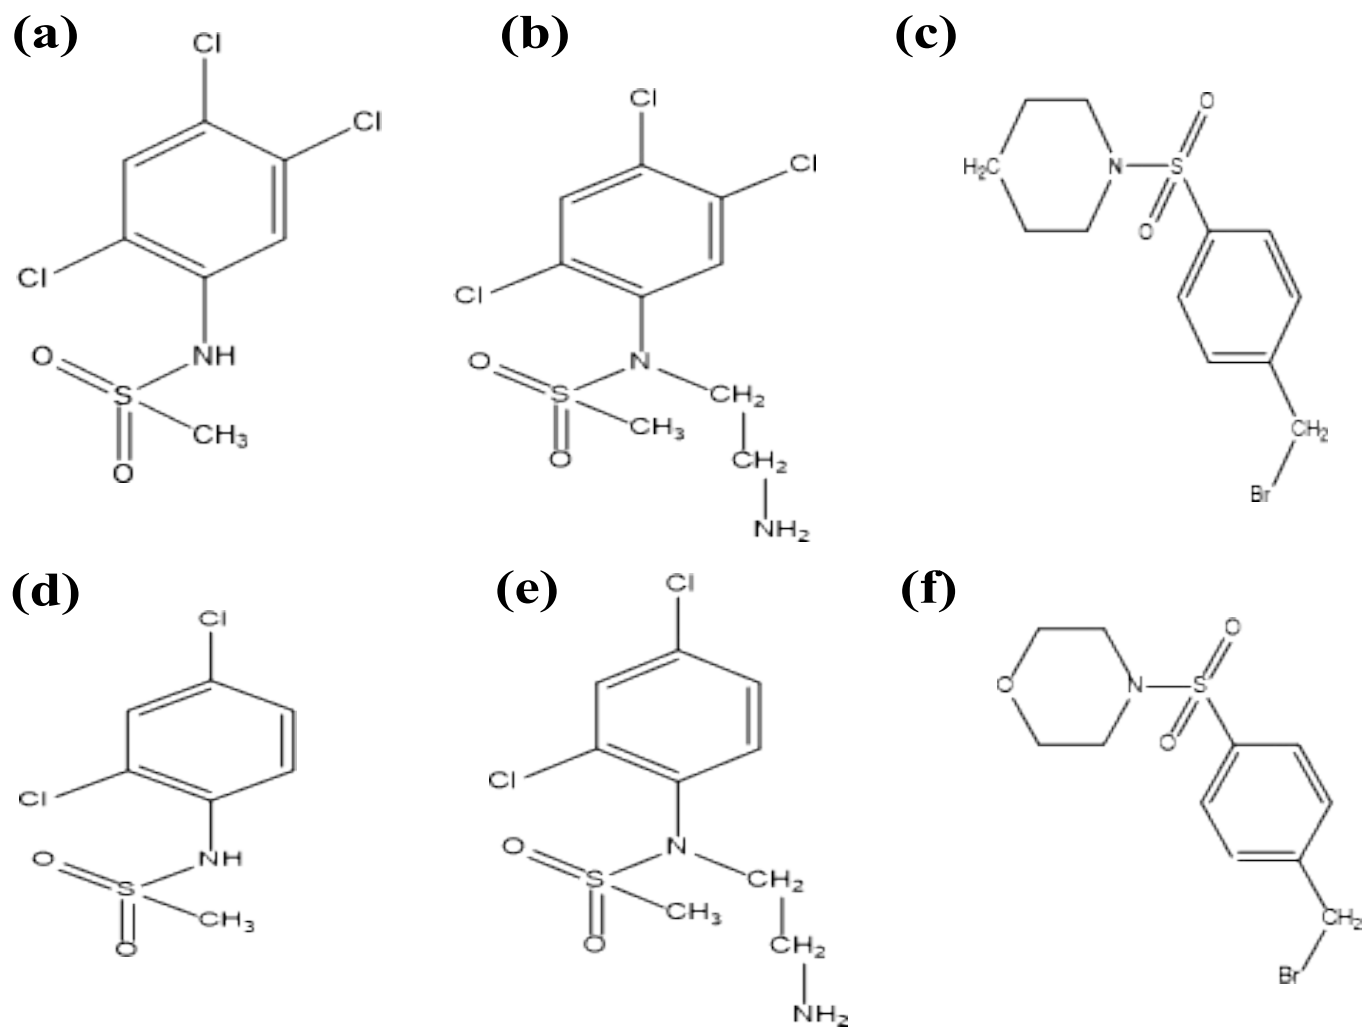

**Figure S1:** Structures of fragments of hit compounds TCM, TCP, DCP and DCM. The fragments are 24MSC (a), M24D (b), BSPP (c), ABR1 (d), ABR2 (e), BBMP (f)

**Table S1:** Physical properties of fragments of the hit compounds TCM, TCP, DCP and DCM.

| S. No. | Properties of Compounds | 24MSC                                                           | M24D                                                                           | BSPP                                                | ABR1                                                            | ABR2                                                                                        | BBMP                                                |
|--------|-------------------------|-----------------------------------------------------------------|--------------------------------------------------------------------------------|-----------------------------------------------------|-----------------------------------------------------------------|---------------------------------------------------------------------------------------------|-----------------------------------------------------|
| 1      | Physical appearance     | Solid                                                           | Solid                                                                          | Solid                                               | Solid                                                           | Solid                                                                                       | Solid                                               |
| 2      | Colour                  | Beige                                                           | Vivid white                                                                    | Cream                                               | White                                                           | White                                                                                       | Pure white                                          |
| 3      | Chemical formula        | C <sub>7</sub> H <sub>6</sub> Cl <sub>3</sub> NO <sub>2</sub> S | C <sub>9</sub> H <sub>11</sub> Cl <sub>3</sub> N <sub>2</sub> O <sub>2</sub> S | C <sub>12</sub> H <sub>16</sub> BrNO <sub>2</sub> S | C <sub>7</sub> H <sub>7</sub> Cl <sub>2</sub> NO <sub>2</sub> S | C <sub>9</sub> H <sub>12</sub> Cl <sub>2</sub> N <sub>2</sub> O <sub>2</sub> S <sub>2</sub> | C <sub>11</sub> H <sub>14</sub> BrNO <sub>3</sub> S |
| 4      | Molecular weight        | 274.55 g/mol                                                    | 317.62 g/mol                                                                   | 320.20 g/mol                                        | 240.11.20 g/mol                                                 | 283.17 g/mol                                                                                | 318.23 g/mol                                        |
| 5      | Solubility              | Chloroform<br>DMSO                                              | Chloroform<br>DMSO                                                             | Chloroform<br>DMSO                                  | Chloroform<br>DMSO                                              | Chloroform<br>DMSO                                                                          | Chloroform<br>DMSO                                  |
| 6      | Melting Point           | 100 - 103 °C                                                    | 94 - 96 °C                                                                     | 100 - 102 °C                                        | 125 - 128 °C                                                    | 128 -130 °C                                                                                 | 150 -153 °C                                         |

## Appendix C – NMR spectra of the hit compounds

### <sup>1</sup>H NMR spectrum of DCM

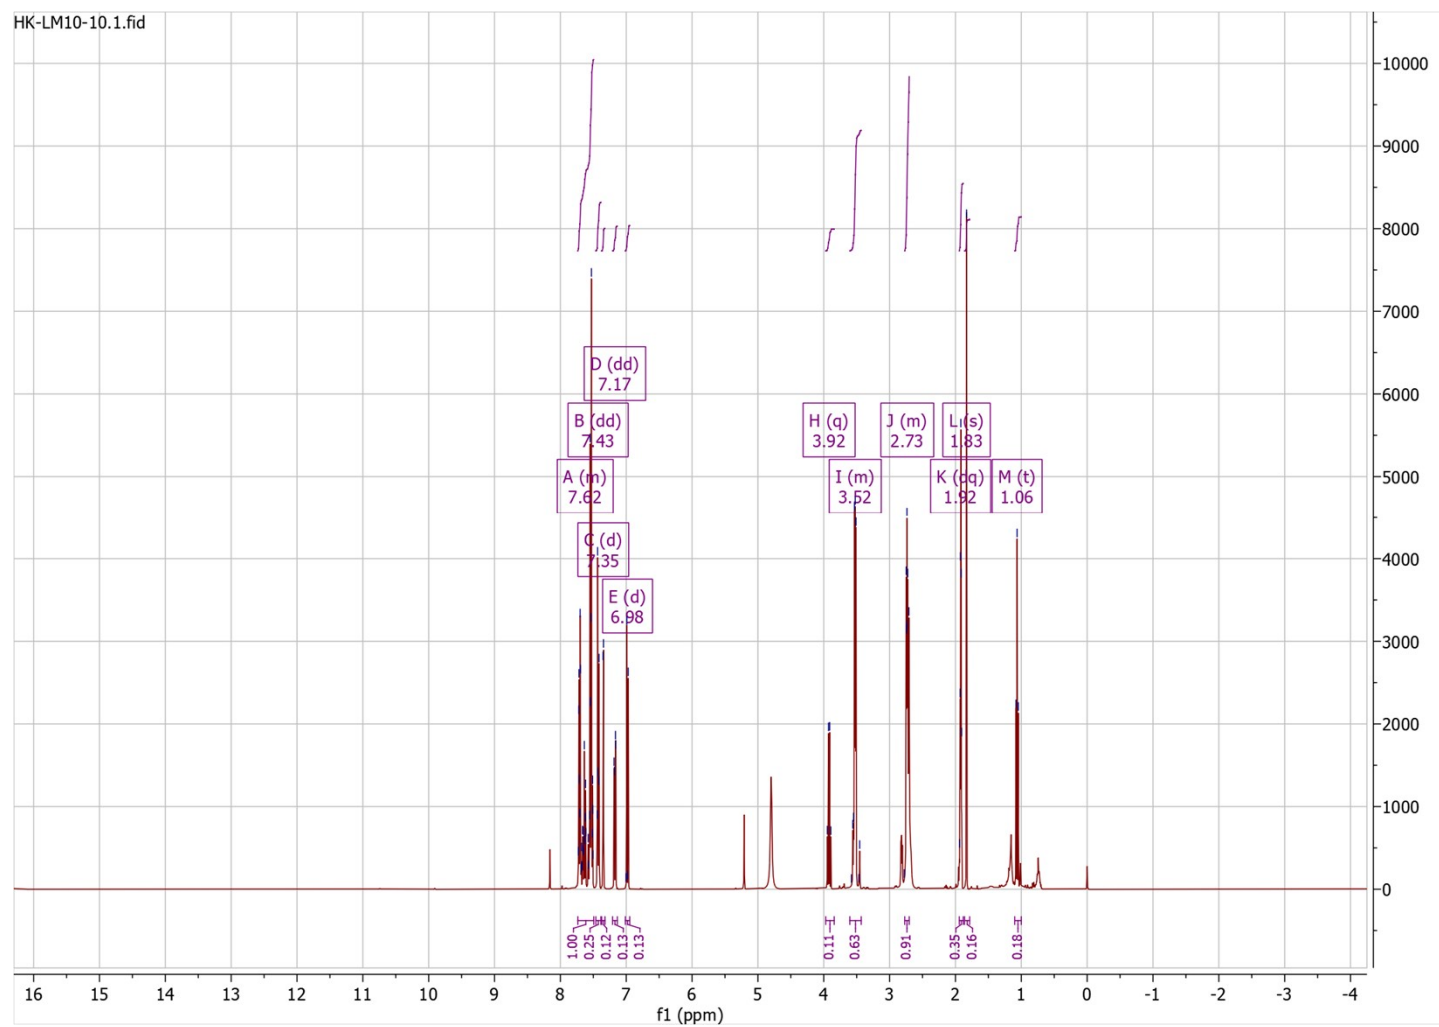

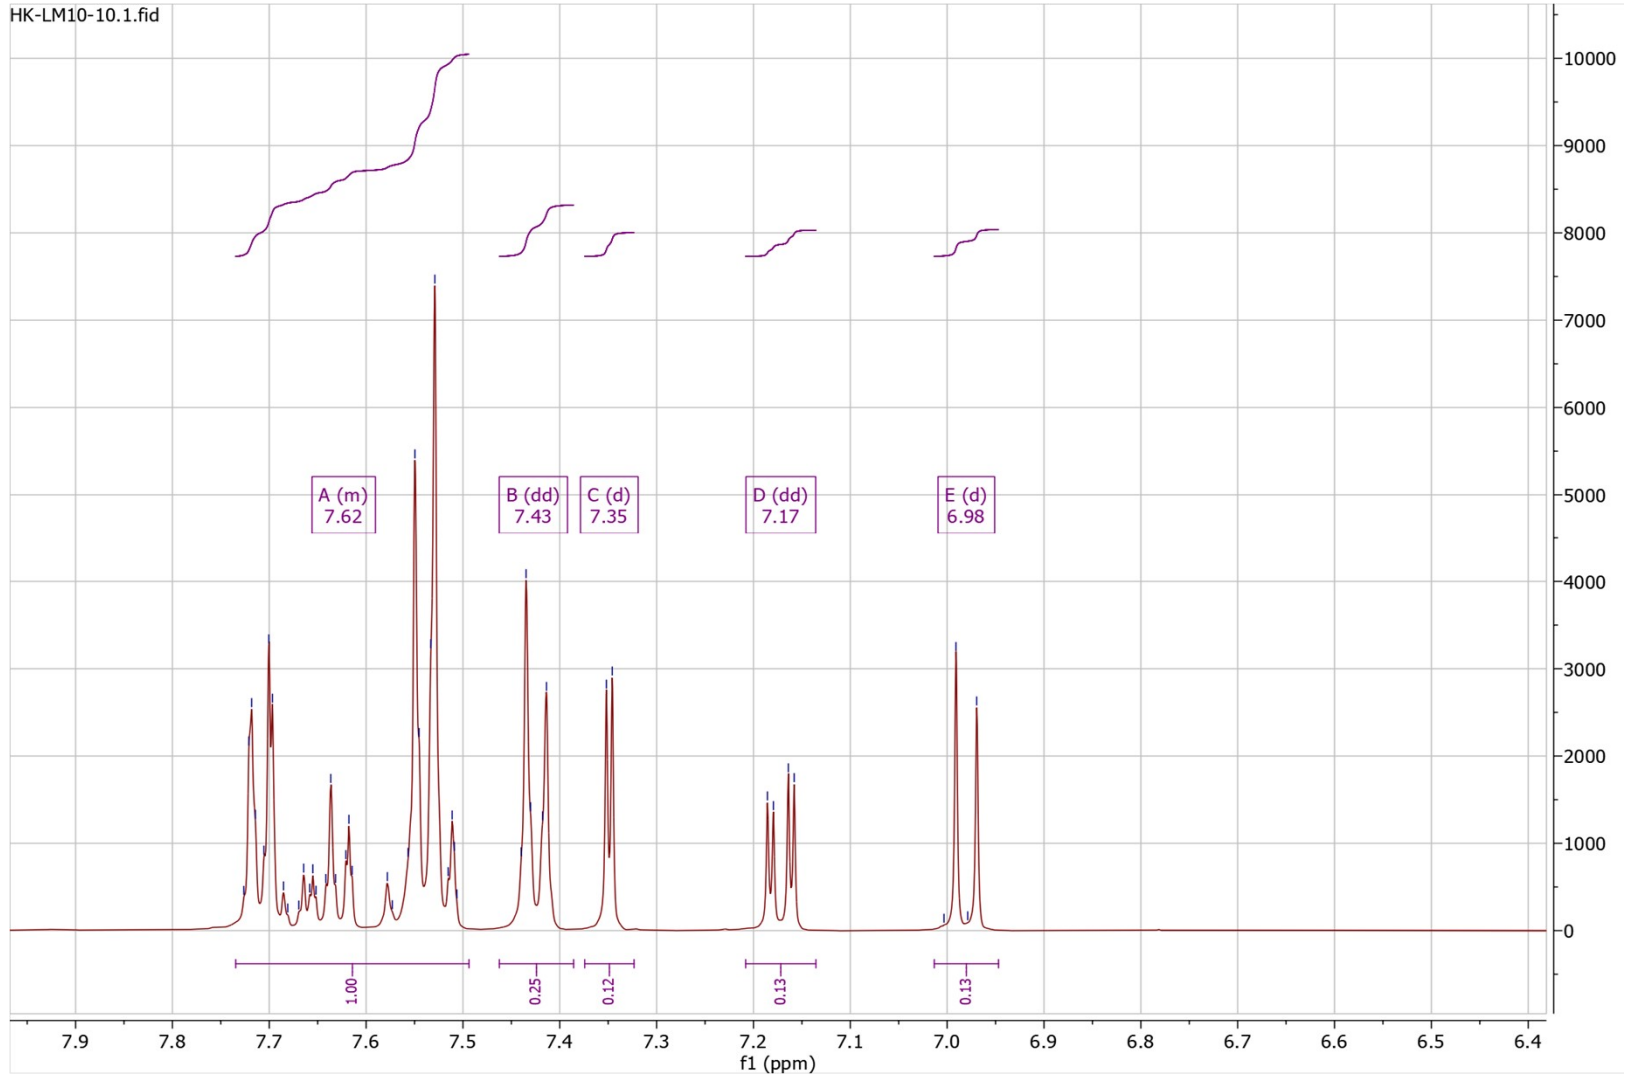

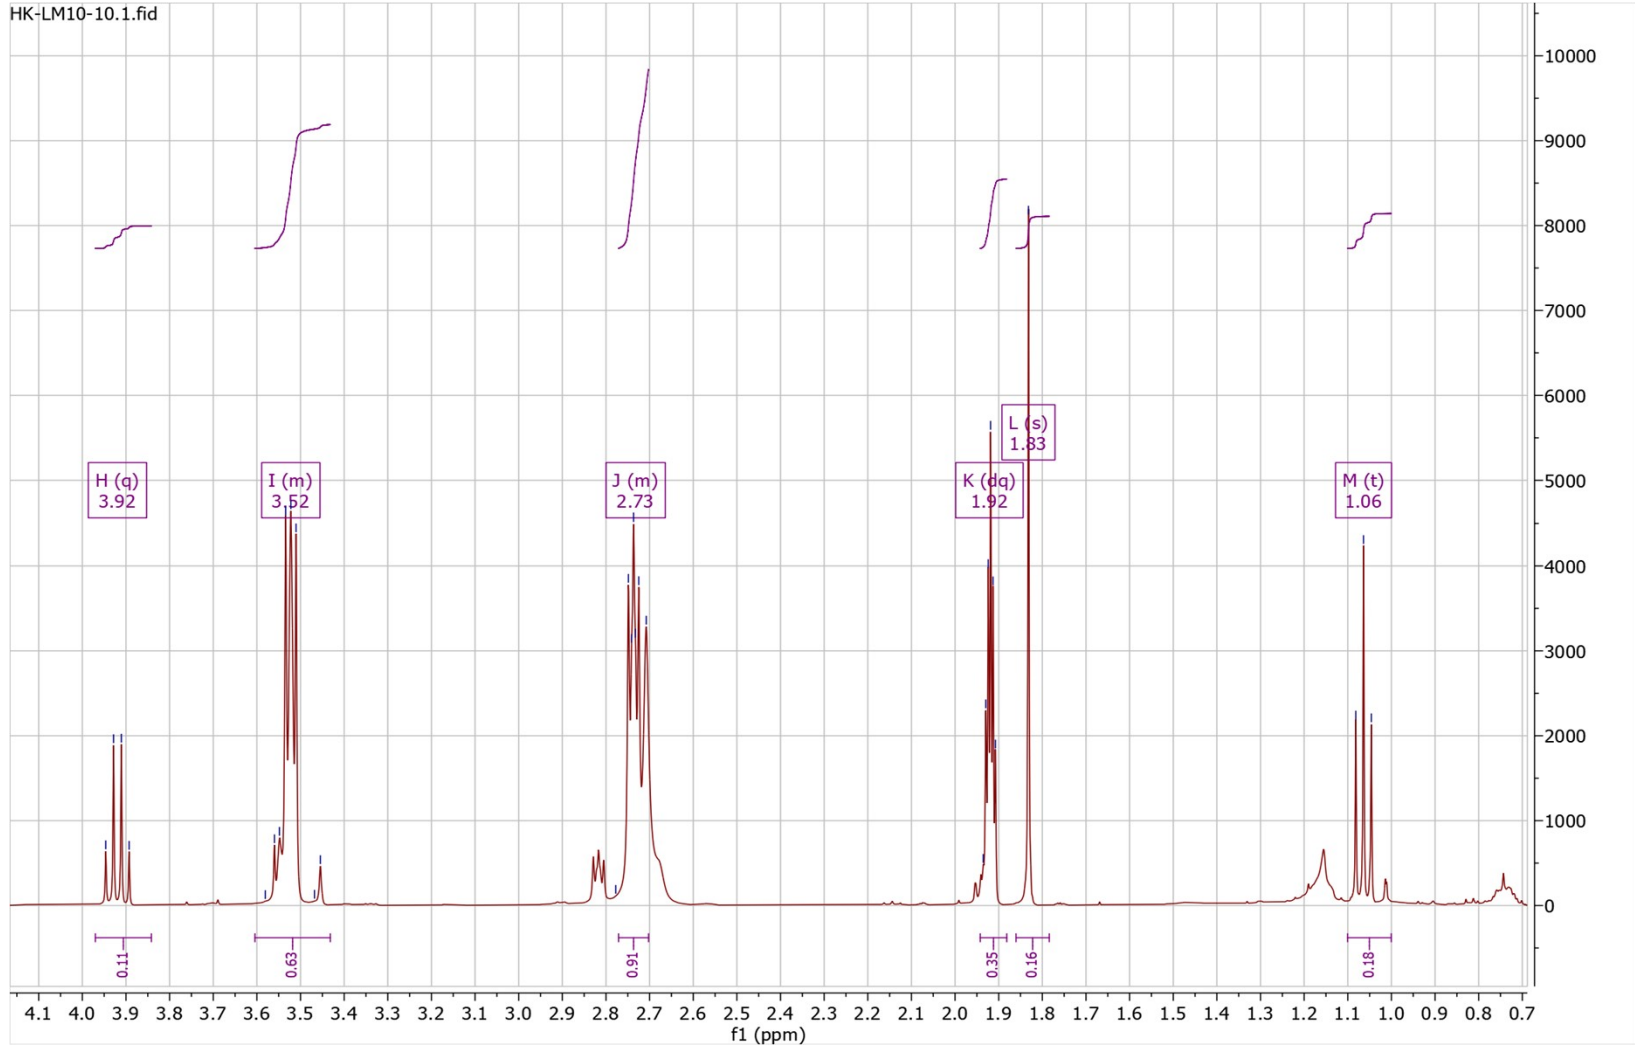



# <sup>1</sup>H NMR spectrum of TCM

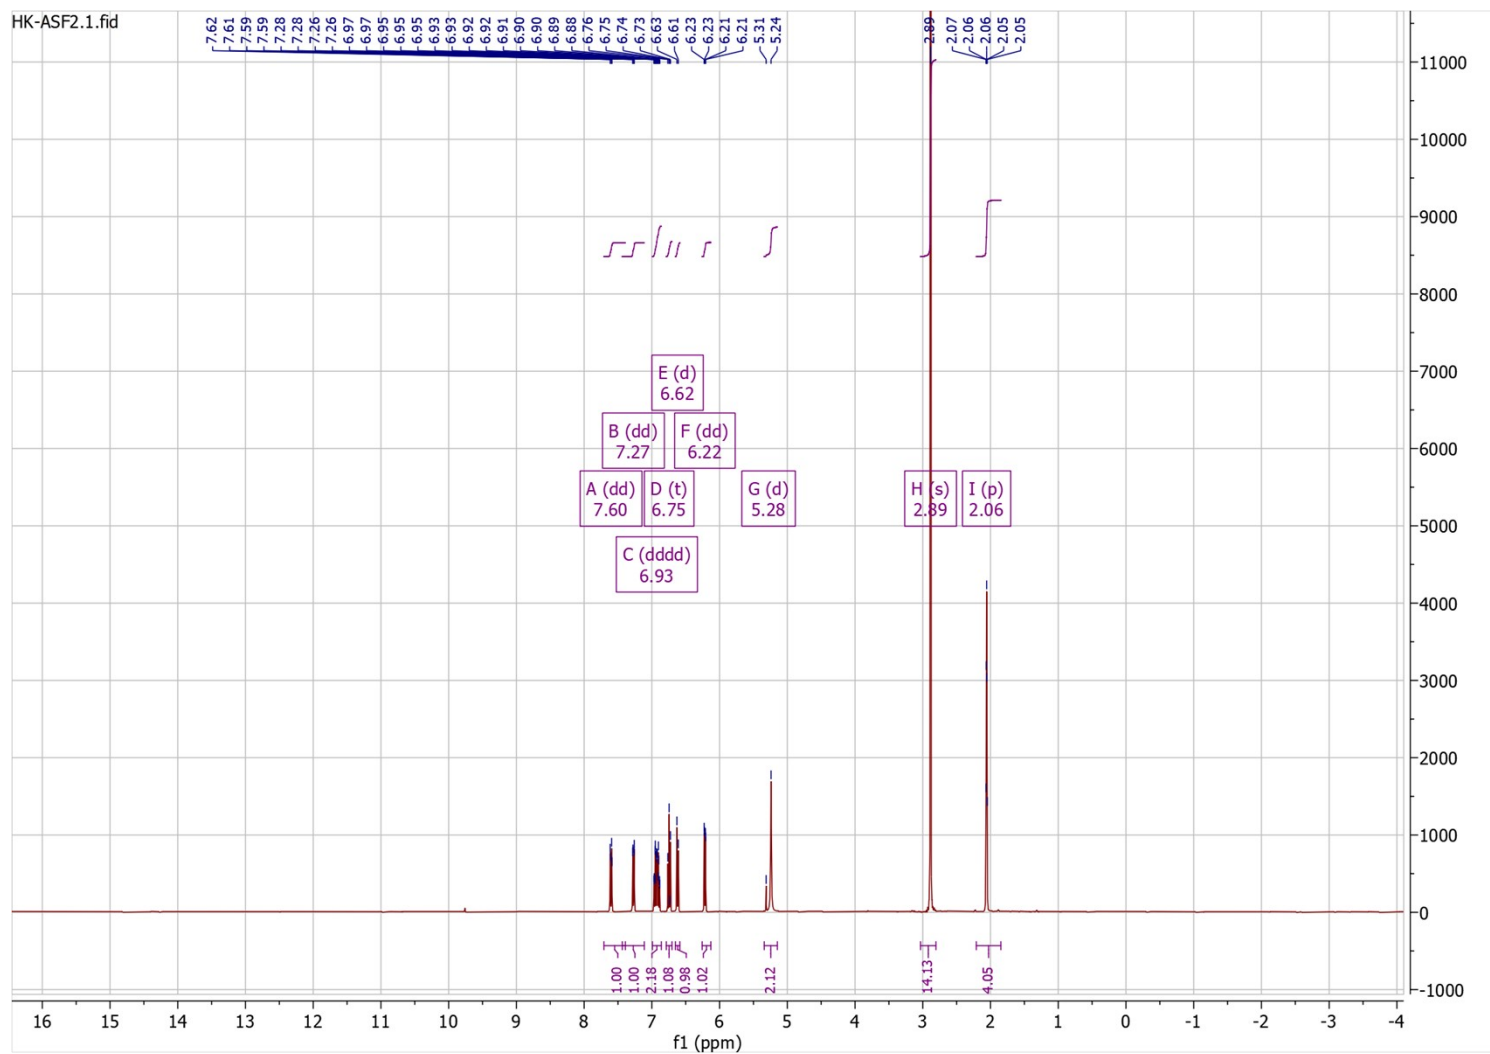

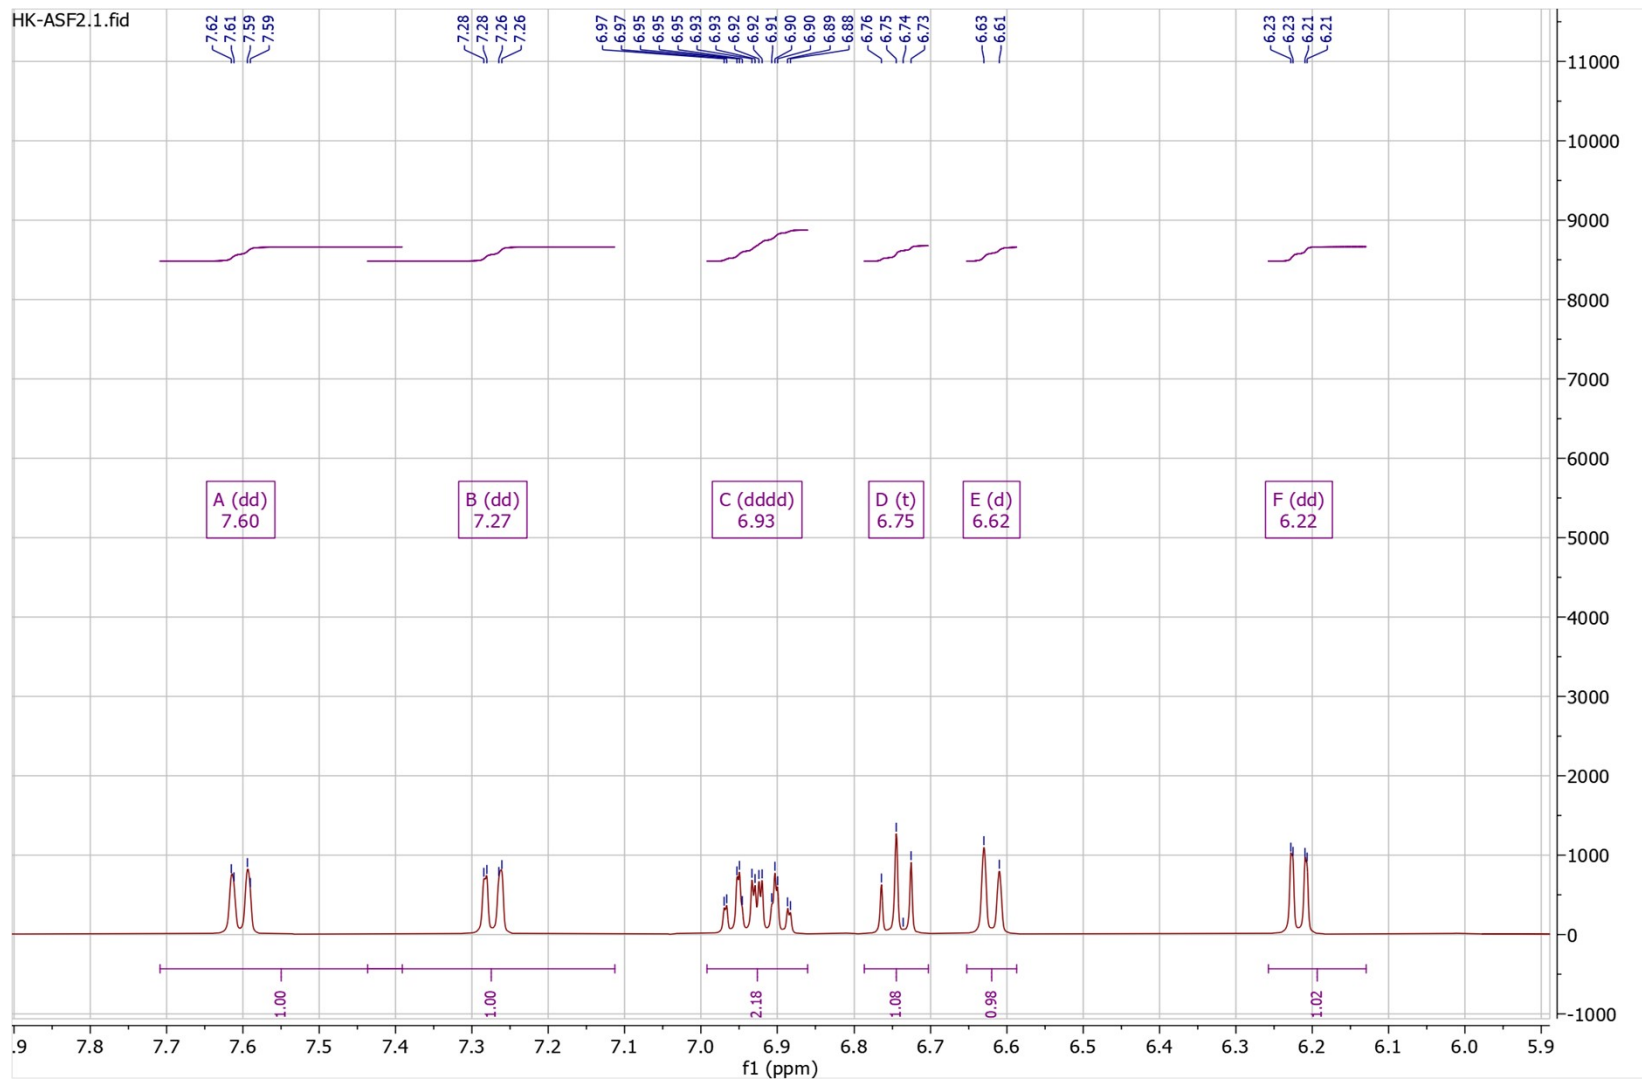

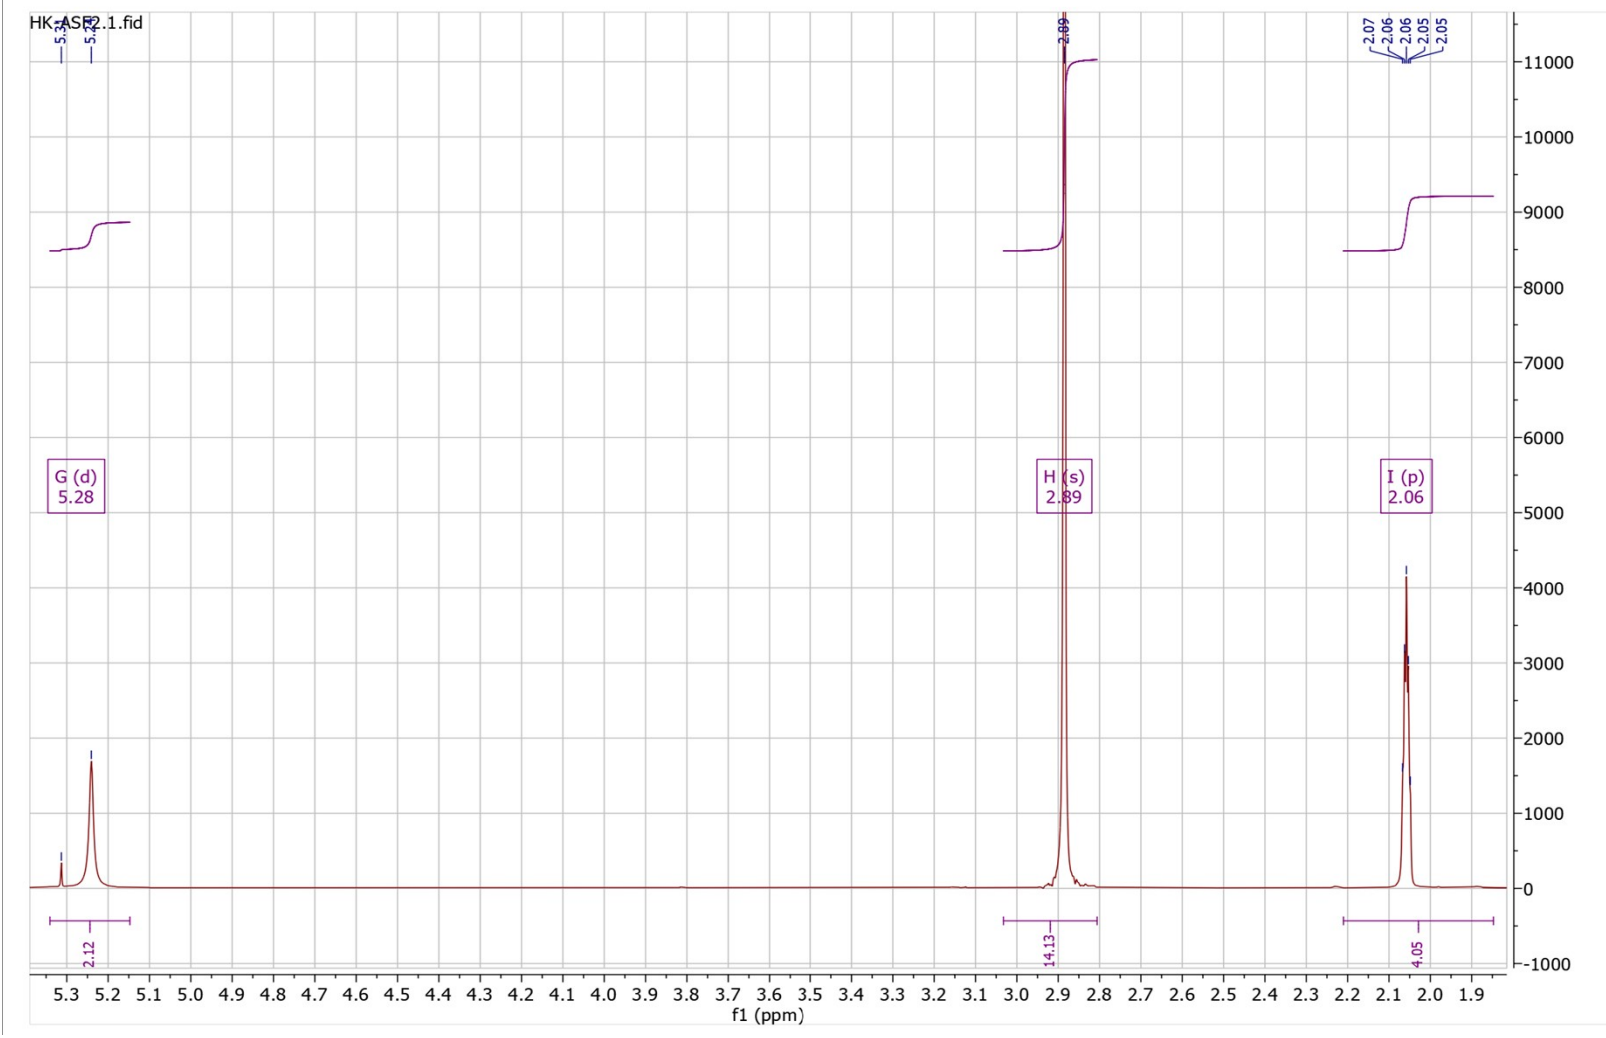

# <sup>1</sup>H NMR spectrum of DCP

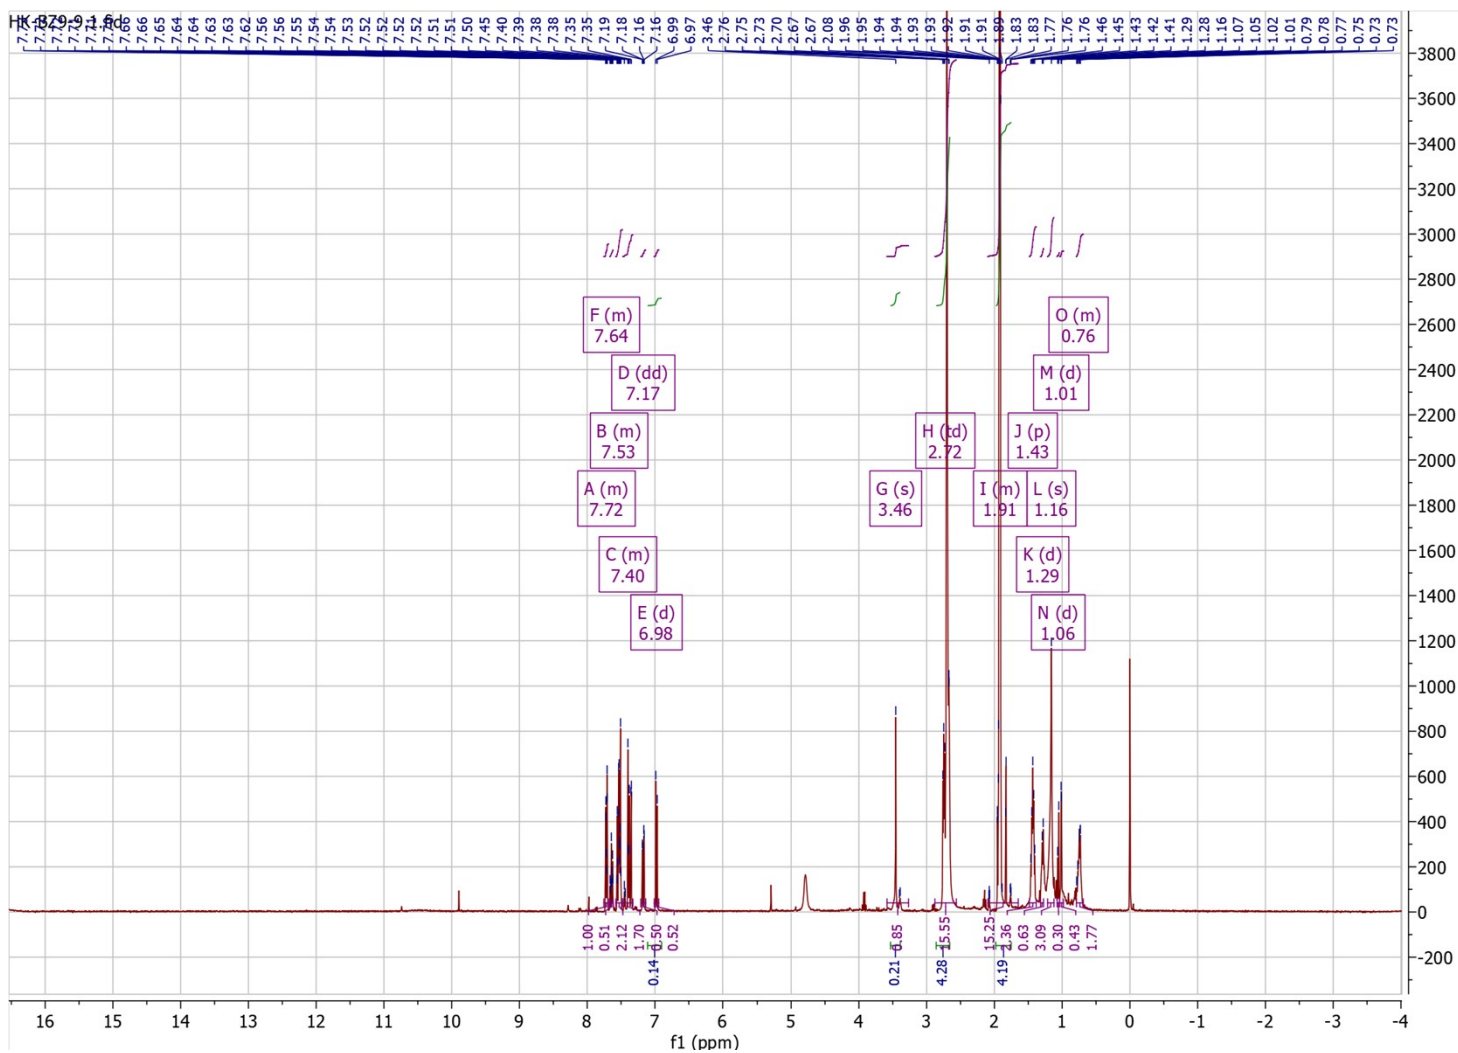

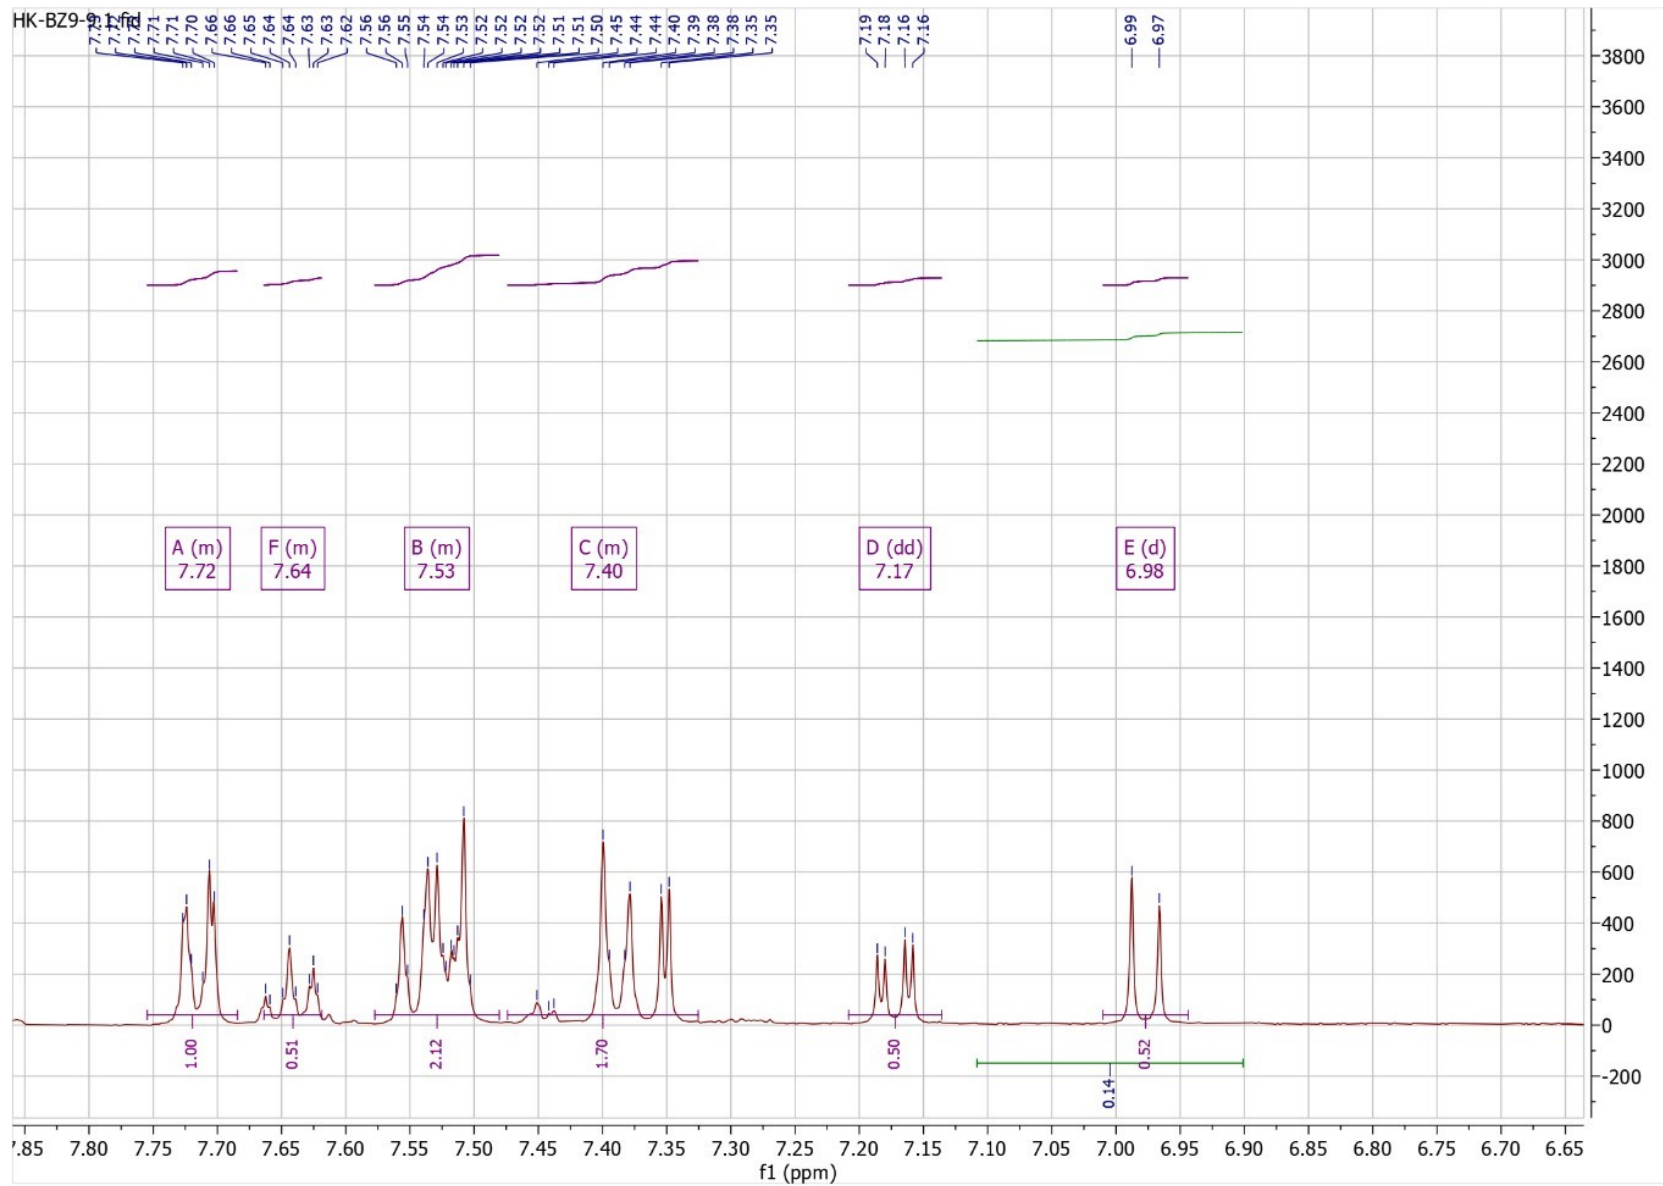

# <sup>1</sup>H NMR spectrum of TCP

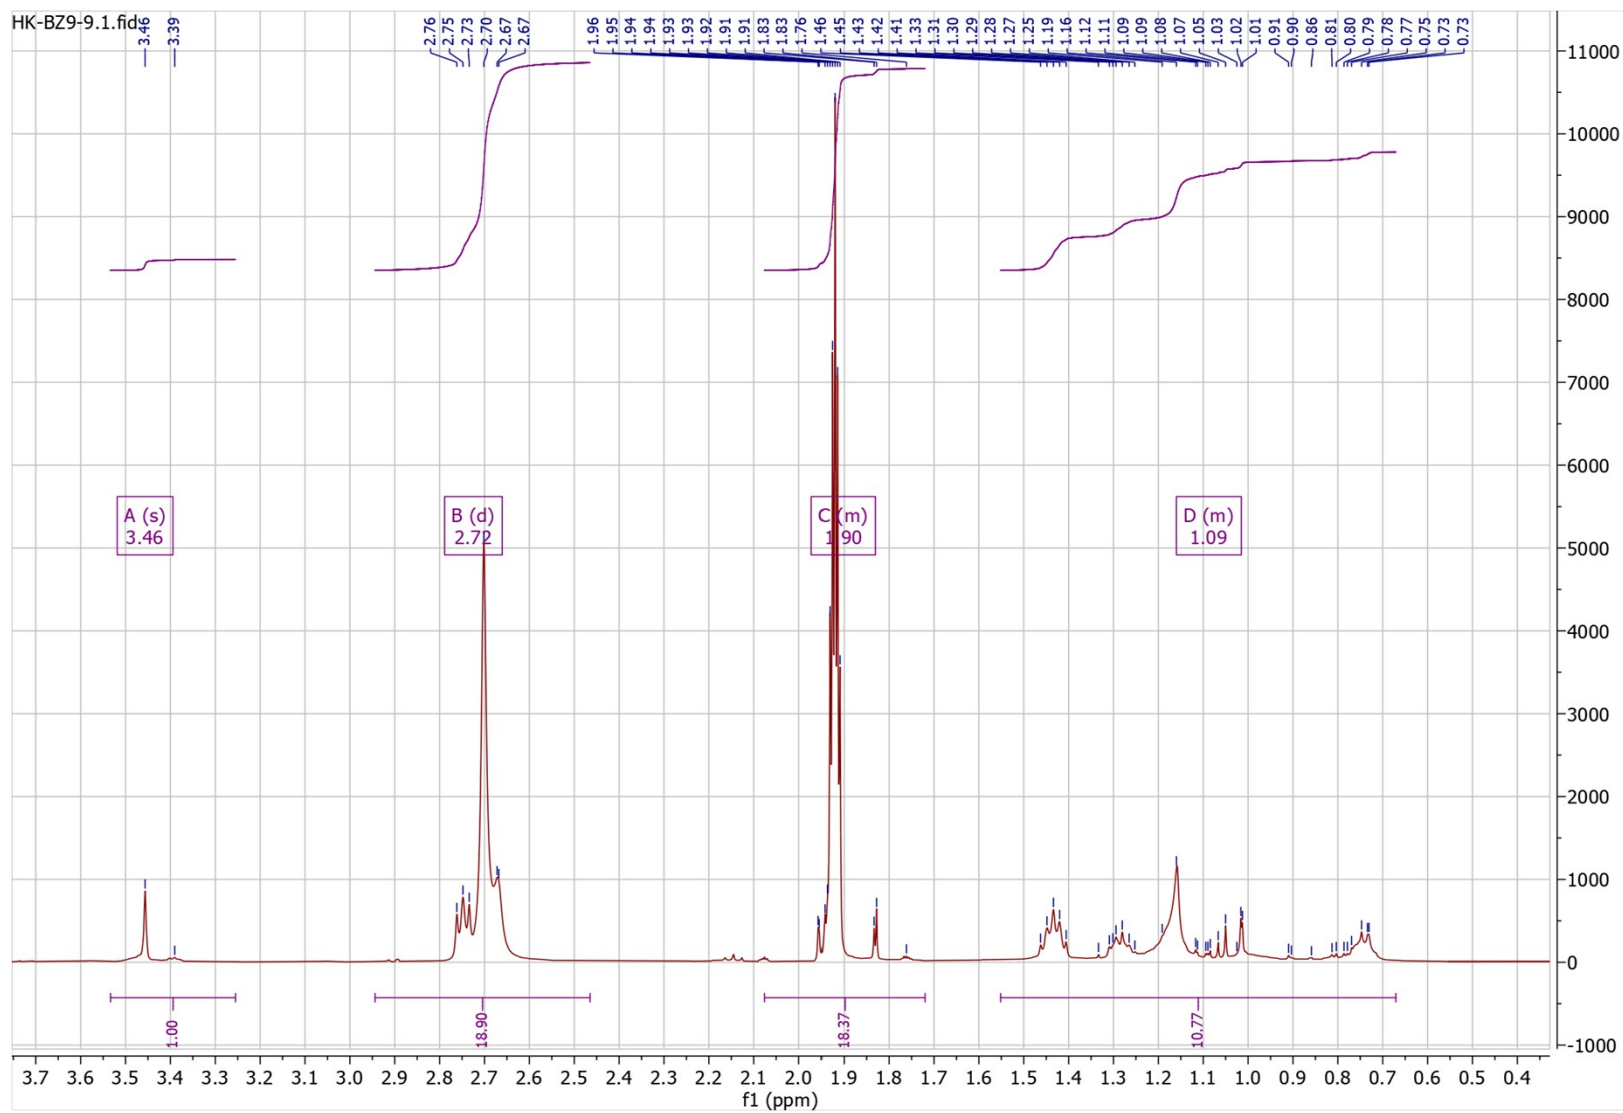

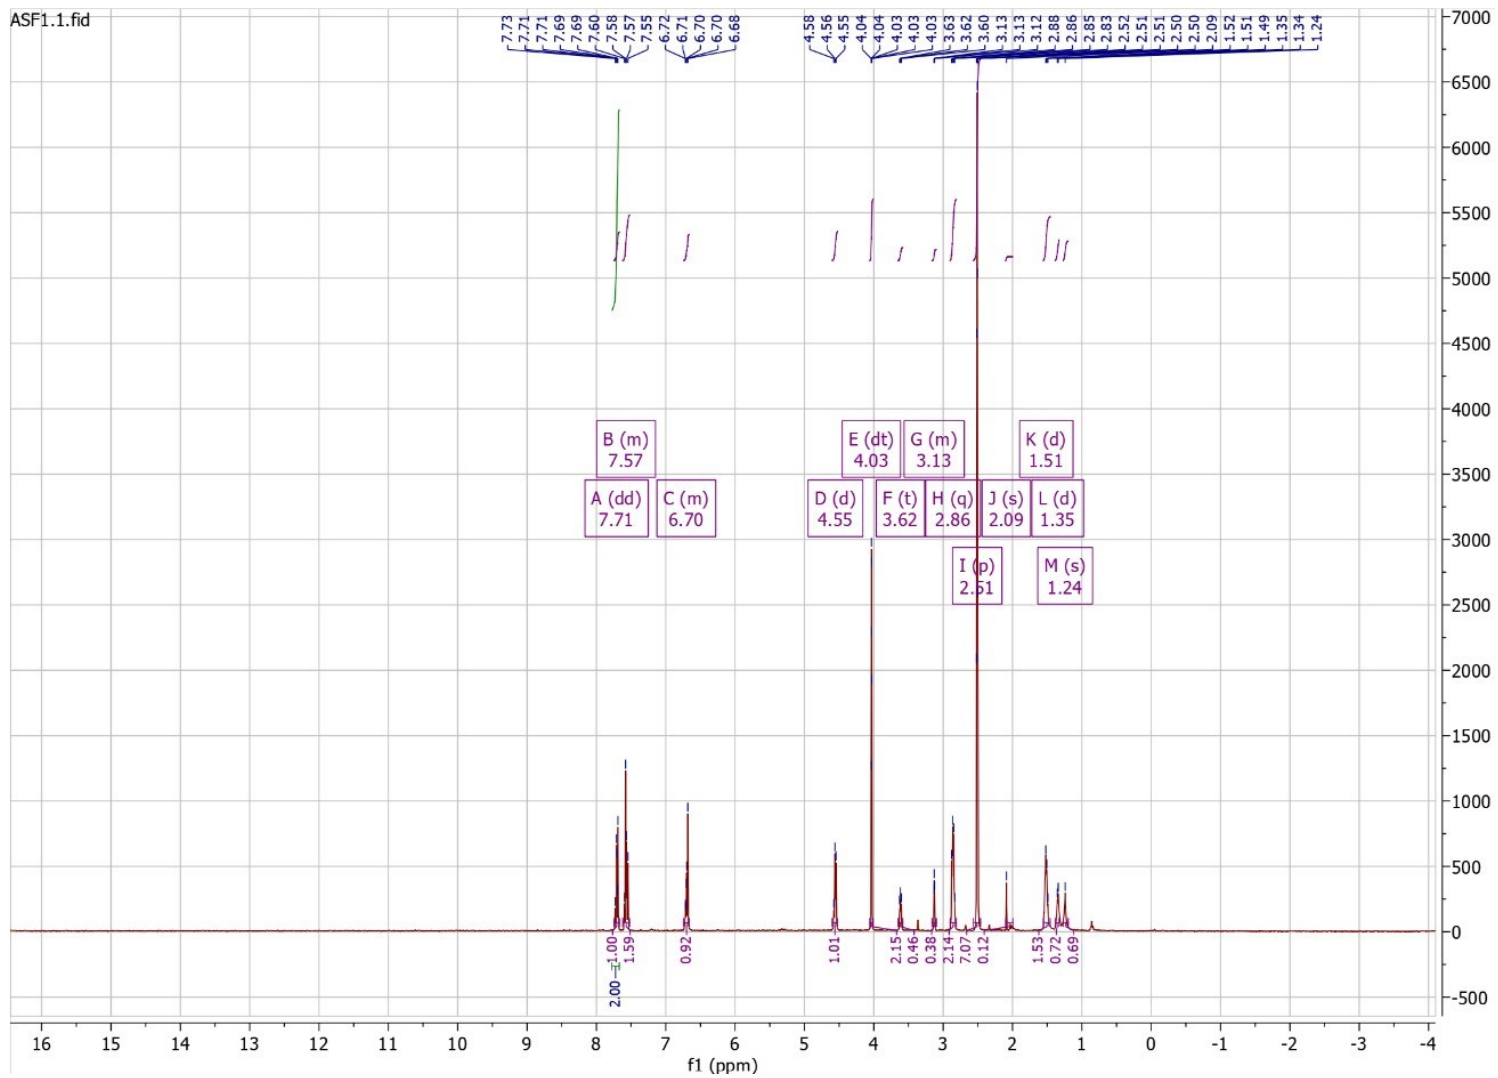

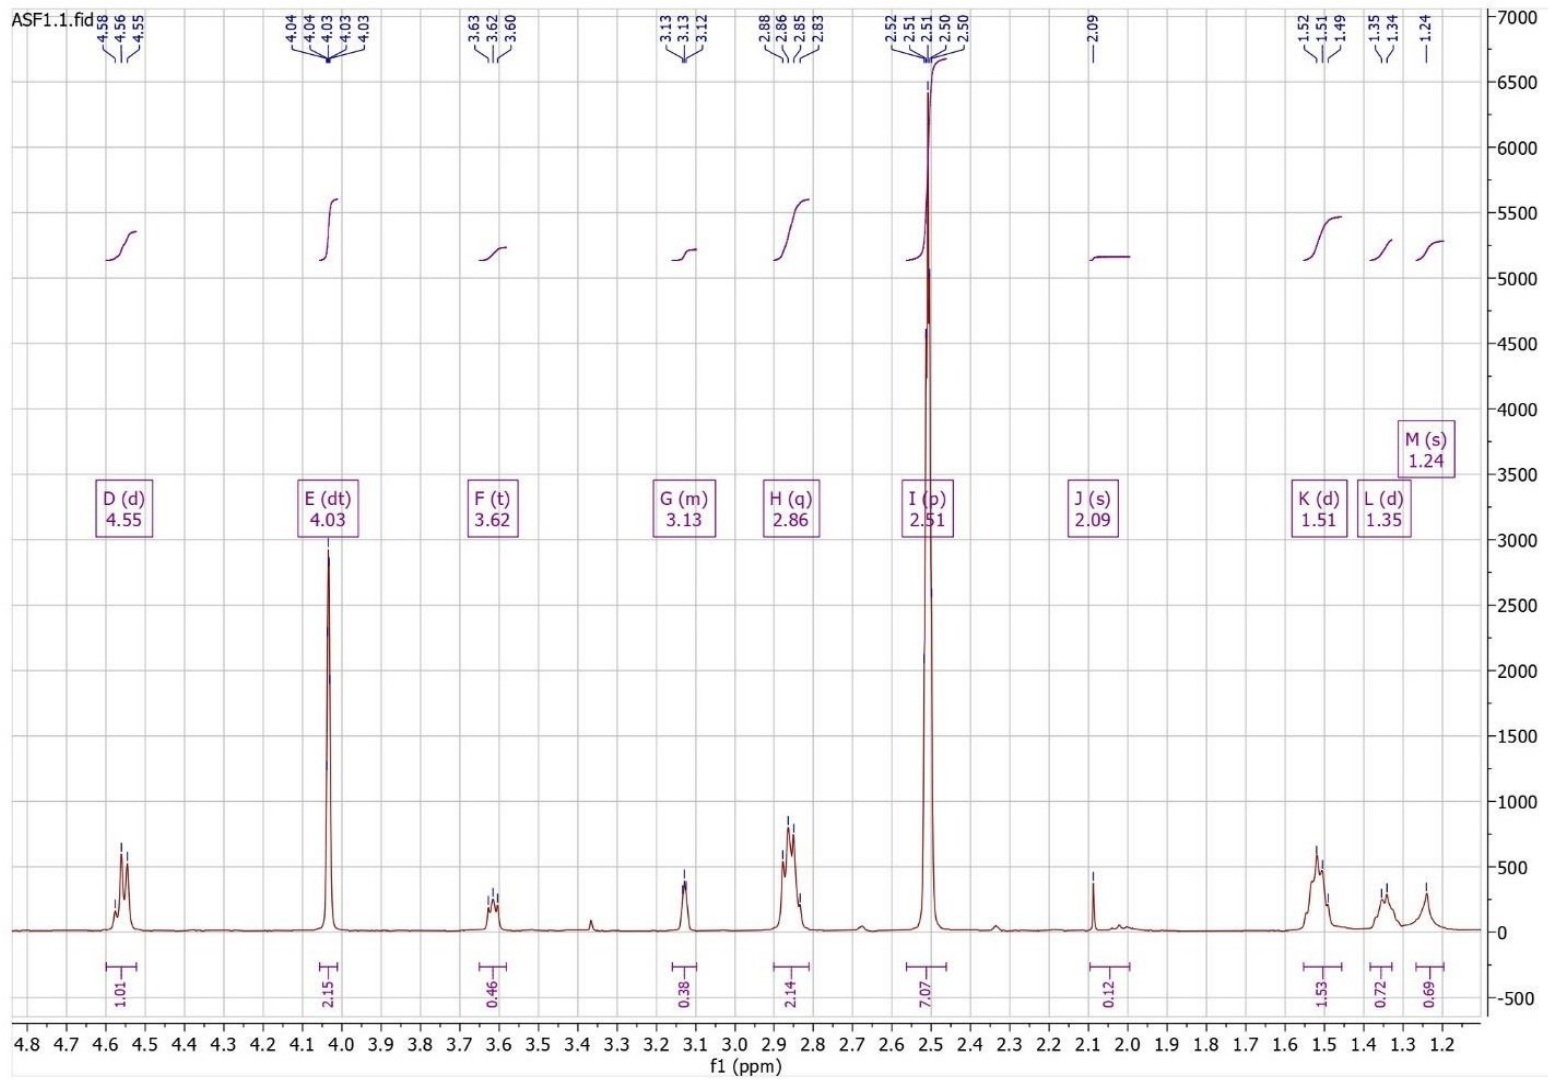



ASF1.1.fid

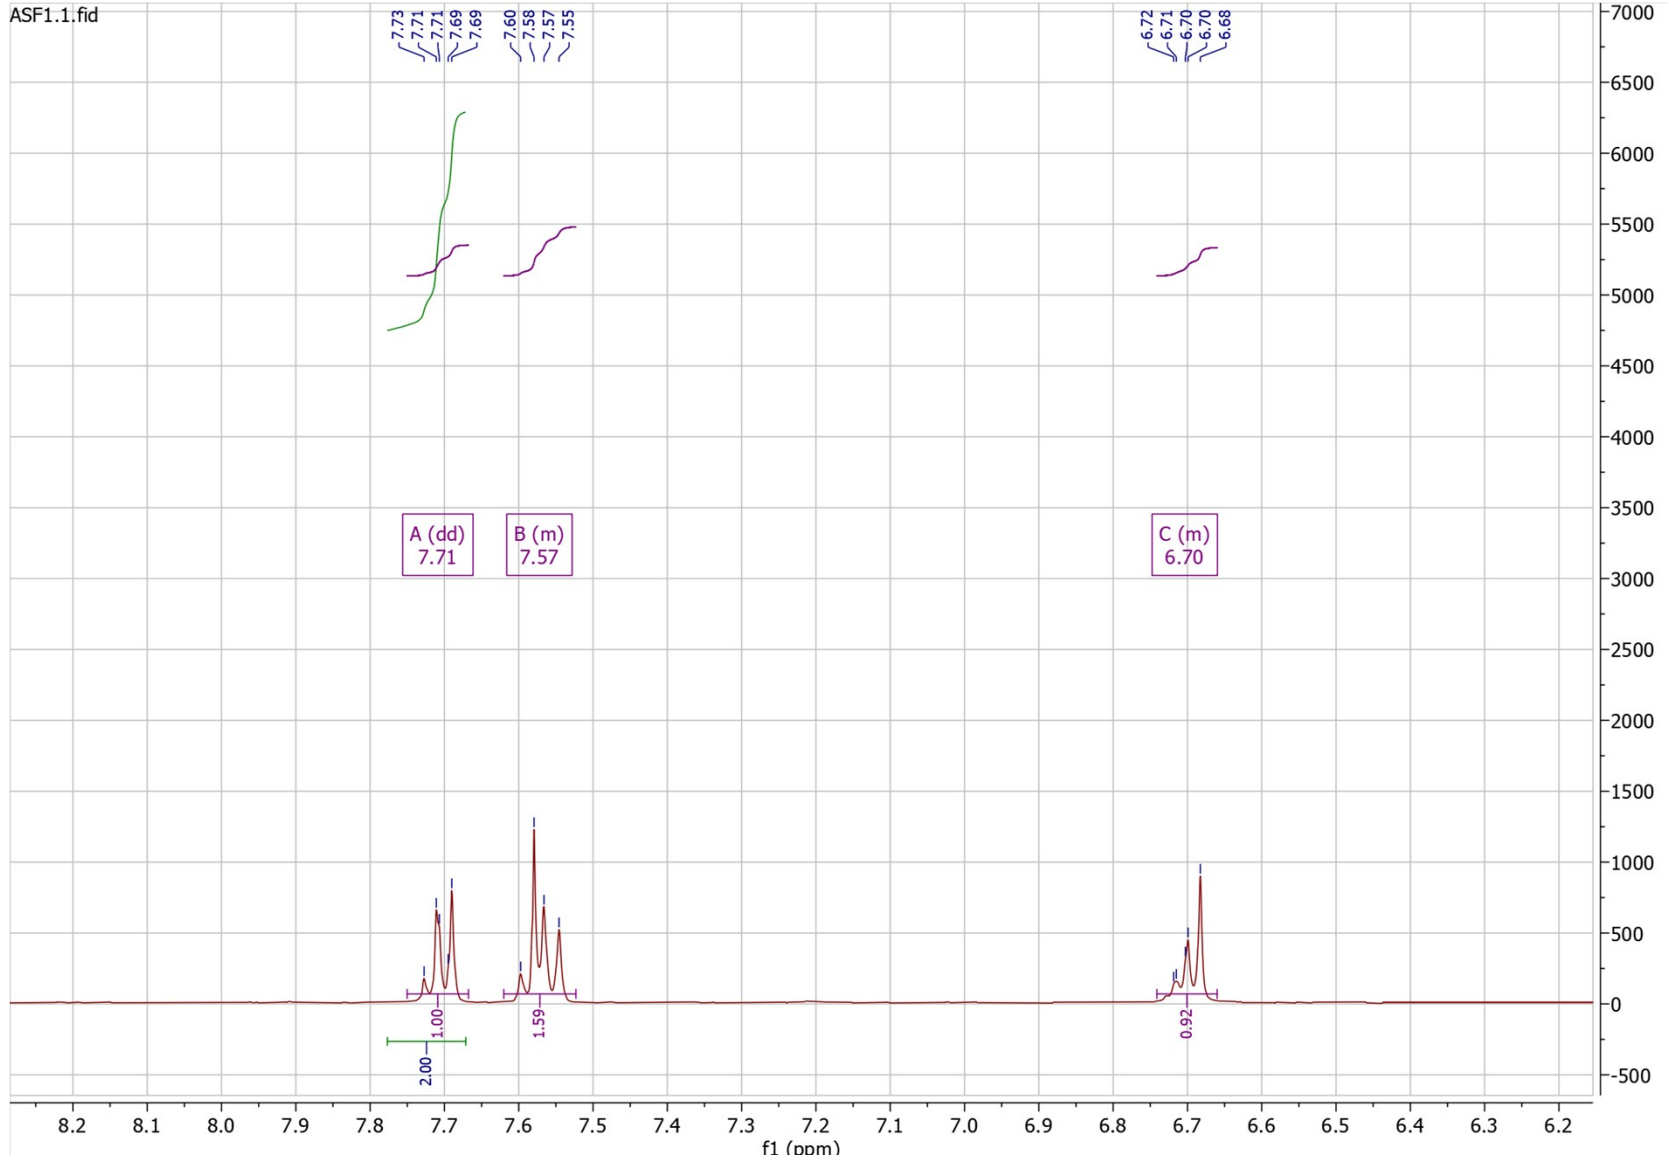

# Appendix D – pH Scouting

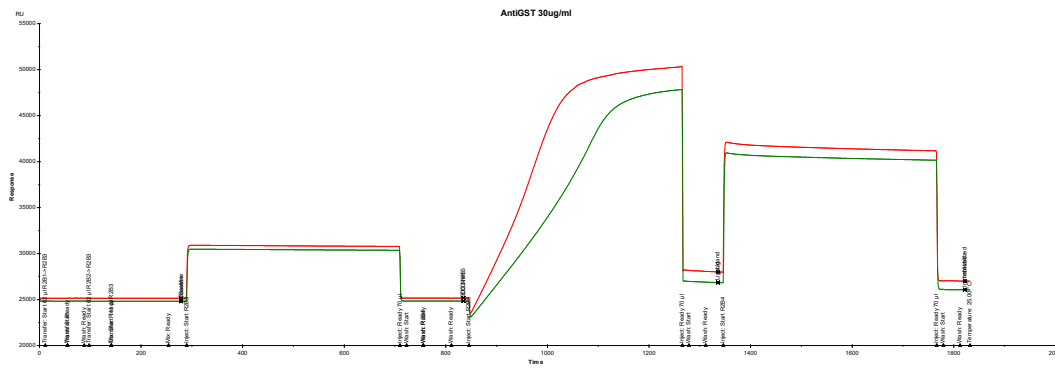

Figure S1: pH Scouting graph

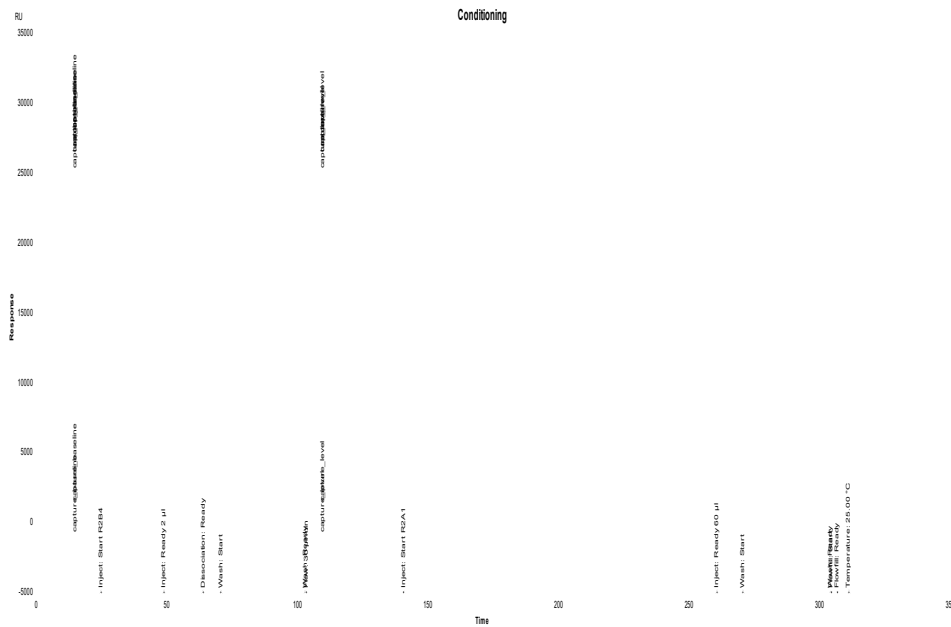

Figure S2: Graph showing Conditioning

## Appendix E – SPR wizard parameters for single cell kinetics

### <HtmlPreview>General settings

---

|                                       |                            |
|---------------------------------------|----------------------------|
| Temperature after run used            | No                         |
| Sample compartment temperature        | 25°C                       |
| Sample compartment temperature varies | No                         |
| Data collection rate                  | 10Hz                       |
| Concentration unit                    | nM                         |
| A                                     | [No buffer name specified] |
| B                                     | [No buffer name specified] |
| C                                     | [No buffer name specified] |
| D                                     | [No buffer name specified] |
| Detection                             | Multi                      |
| Flow path                             | 2-1,4-3                    |

### Cycle Types

---

GST kinetics

GST conditioning

### Commands in cycle type GST kinetics

---

#### Capture 1

|                    |     |
|--------------------|-----|
| Capture solution   | GST |
| Contact time (s)   | 180 |
| Flow rate (µl/min) | 5   |
| Flow path          | 1   |

---

#### Capture 2

|                  |          |
|------------------|----------|
| Capture solution | GST-CDK2 |
| Contact time (s) | 180      |

|                                        |     |
|----------------------------------------|-----|
| Flow rate ( $\mu\text{l}/\text{min}$ ) | 5   |
| Flow path                              | 2   |
| Stabilization period (s)               | 180 |

---

#### Capture 3

|                                        |     |
|----------------------------------------|-----|
| Capture solution                       | GST |
| Contact time (s)                       | 60  |
| Flow rate ( $\mu\text{l}/\text{min}$ ) | 10  |
| Flow path                              | 3   |

---

#### Capture 4

|                                        |         |
|----------------------------------------|---------|
| Capture solution                       | GST-hcv |
| Contact time (s)                       | 60      |
| Flow rate ( $\mu\text{l}/\text{min}$ ) | 10      |
| Flow path                              | 4       |
| Stabilization period (s)               | 180     |

---

#### Sample 1

|                                        |                       |
|----------------------------------------|-----------------------|
| Type                                   | Single Cycle Kinetics |
| Sample solution                        | Is Variable           |
| Contact time (s)                       | 120                   |
| Dissociation time (s)                  | 600                   |
| Flow rate ( $\mu\text{l}/\text{min}$ ) | 30                    |
| Flow path                              | 1,2,3,4               |
| Extra wash solution                    | 50% DMSO              |
| MW                                     | Is variable           |
| Conc (1)                               | Is variable           |
| Conc (2)                               | Is variable           |
| Conc (3)                               | Is variable           |
| Conc (4)                               | Is variable           |
| Conc (5)                               | Is variable           |

---

#### Regeneration 1

| Regeneration solution                  | Reg solution |
|----------------------------------------|--------------|
| Contact time (s)                       | 120          |
| Flow rate ( $\mu\text{l}/\text{min}$ ) | 30           |
| Flow path                              | 1,2,3,4      |
| High viscosity                         | No           |

---

## References

- [1] T. Schwede, J. Kopp, N. Guex, and M. C. Peitsch, "SWISS-MODEL: an automated protein homology-modeling server," *Nucleic Acids Res.*, vol. 31, no. 13, pp. 3381–3385, 2003.
- [2] W. J. Allen *et al.*, "DOCK 6: Impact of new features and current docking performance," *J. Comput. Chem.*, vol. 36, no. 15, pp. 1132–1156, 2015.
- [3] E. F. Pettersen *et al.*, "UCSF Chimera - A visualization system for exploratory research and analysis," *J. Comput. Chem.*, vol. 25, no. 13, pp. 1605–1612, 2004.
- [4] Schrödinger, LLC, "The {PyMOL} Molecular Graphics System, Version~1.8," Nov. 2015.
- [5] W. Humphrey, A. Dalke, and K. Schulten, "VMD: visual molecular dynamics," *J. Mol. Graph.*, vol. 14, no. 1, pp. 33–38, 1996.
- [6] D. S. BIOVIA, "BIOVIA Discovery Studio Visualizer, v16. 1.0. 15350," *San Diego Dassault Systèmes*, 2015.
- [7] A. C. Wallace, R. A. Laskowski, and J. M. Thornton, "LIGPLOT: a program to generate schematic diagrams of protein-ligand interactions," *Protein Eng. Des. Sel.*, vol. 8, no. 2, pp. 127–134, 1995.
- [8] S. Salentin, S. Schreiber, V. J. Haupt, M. F. Adasme, and M. Schroeder, "PLIP: fully automated protein--ligand interaction profiler," *Nucleic Acids Res.*, vol. 43, no. W1, pp. W443--W447, 2015.
- [9] S. Forli, "Raccoon| AutoDock VS: an automated tool for preparing AutoDock virtual screenings." 2010.
- [10] N. M. O'Boyle, M. Banck, C. A. James, C. Morley, T. Vandermeersch, and G. R. Hutchison, "Open Babel: An open chemical toolbox," *J. Cheminform.*, vol. 3, no. 1, pp. 1–14, 2011.
- [11] M. D. Hanwell, D. E. Curtis, D. C. Lonie, T. Vandermeersch, E. Zurek, and G. R. Hutchison, "Avogadro: an advanced semantic chemical editor, visualization, and analysis platform," *J. Cheminform.*, vol. 4, no. 1, pp. 1–17, 2012.
- [12] M. Froimowitz, "HyperChem: a software package for computational chemistry and molecular modeling," *Biotechniques*, vol. 14, no. 6, p. 1010—1013, Jun. 1993.
- [13] S. Joy, P. S. Nair, R. Hariharan, and M. R. Pillai, "Detailed comparison of the protein-ligand docking efficiencies of GOLD, a commercial package and ArgusLab, a licensable freeware," *In Silico Biol.*, vol. 6, no. 6, pp. 601–605, 2006.
- [14] L. D. Mendelsohn, "ChemDraw 8 ultra, windows and macintosh versions," *J. Chem. Inf. Comput. Sci.*, vol. 44, no. 6, pp. 2225–2226, 2004.
- [15] D. Van Der Spoel, E. Lindahl, B. Hess, G. Groenhof, A. E. Mark, and H. J. C. Berendsen, "GROMACS: fast, flexible, and free," *J. Comput. Chem.*, vol. 26, no. 16, pp. 1701–1718,

2005.
